# Supplementary material for: The impact of the frequency, duration and type of physiotherapy on discharge after hip fracture surgery: a secondary analysis of UK national linked audit data
Source: PubMed Central journal article supplement — Osteoporos Int. 2021 Nov 8;33(4):839–50. doi: 10.1007/s00198-021-06195-9 (PMC8930962; doi:10.1007/s00198-021-06195-9), 2021-11-08
Supplement: 198_2021_6195_MOESM1_ESM.pdf [file 198_2021_6195_MOESM1_ESM.pdf]

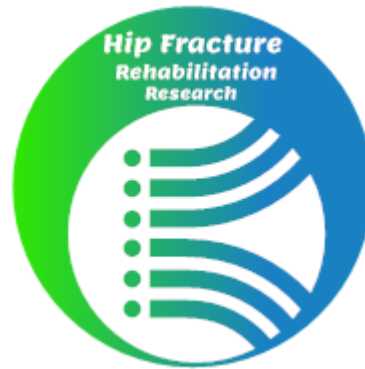

Creating an Analytical Dataset for Studying Effects of Rehabilitation Duration, Frequency and Type on Outcomes of Hip Fracture Surgery

Katie Jane Sheehan, Orouba Almilaji, Aicha Goubar

Technical Report 1-20

## Foreword

This report has been prepared by Aicha Goubar, Orouba Almilaji, and Katie Sheehan. The study objective is to compare health outcomes among patients exposed to various rehabilitation duration, frequency, and types after hip fracture surgery.

### Principal Investigator:

Katie Jane Sheehan, PhD

### Investigators:

Katie Jane Sheehan, Aicha Goubar, Salma Ayis, Catherine Sackley, Finbarr Martin, Toby Smith, Antony Johansen, Celia Gregson, Euan Sadler, Ian Cameron, Morten Tange Kristensen, Lauren Beaupre, Boris Sobolev, Jay Magaziner.

### Data Management:

Aicha Goubar and Orouba Almilaji

### Funding:

This report presents independent research funded by the Chartered Society of Physiotherapy Charitable Trust under its Scheme A Programme. The views expressed are those of the author(s) and not necessarily those of the Chartered Society of Physiotherapy or the Charitable Trust.

### Suggested citation

Goubar A, Almilaji O, Sheehan KJ. Creating an Analytical Dataset for Studying Effects of Rehabilitation Duration, Frequency and Type on Outcomes of Hip Fracture Surgery from the UK Physiotherapy 'Hip Sprint' Audit linked to the National Hip Fracture Dataset and, English and Welsh Hospitalisation Records. Technical Report 1-20. London: King's College London, November 2020.

# 1. INTRODUCTION

The report describes creation of analytical dataset including data linkage, data cleaning, and the identification of new variables from the Physiotherapy ‘Hip Sprint’ Audit, the National Hip Fracture Database, and English/Welsh hospitalisation records.

## 1.1 Data flow

We requested data from:

1. Physiotherapy Hip Fracture Sprint Audit (PHFSA), Falls and Fragility Fracture Audit Programme (FFFAP) (Data processor: Crown Informatics on behalf of data controller Healthcare Quality Improvement Partnership (HQIP));
2. Acute Facilities Audit (AcuteFA), FFFAP (Data processor: Crown Informatics on behalf of data controller HQIP);
3. National Hip Fracture Database (NHFD), FFFAP (Data processor: Crown Informatics on behalf of data controller HQIP);
4. Hospital Episode Statistics (HES) (Data controller: National Health Service Digital (NHSD));
5. Patient Episode Database for Wales (PEDW) (Data controller: NHS Wales Informatics Service (NWIS)).

The Study cohort was identified by Crown Informatics. Personal identifiers were sent to NHSD and NWIS to enable the identification of the study cohort in HES and PEDW. Personal identifiers were then removed by Crown Informatics, NHSD, and NWIS (leaving a Study identifier (ID) intact) prior to release of 5 datasets to Kings College London (KCL). Data flow is outlined in Figure 1.

Figure 1: Data flow

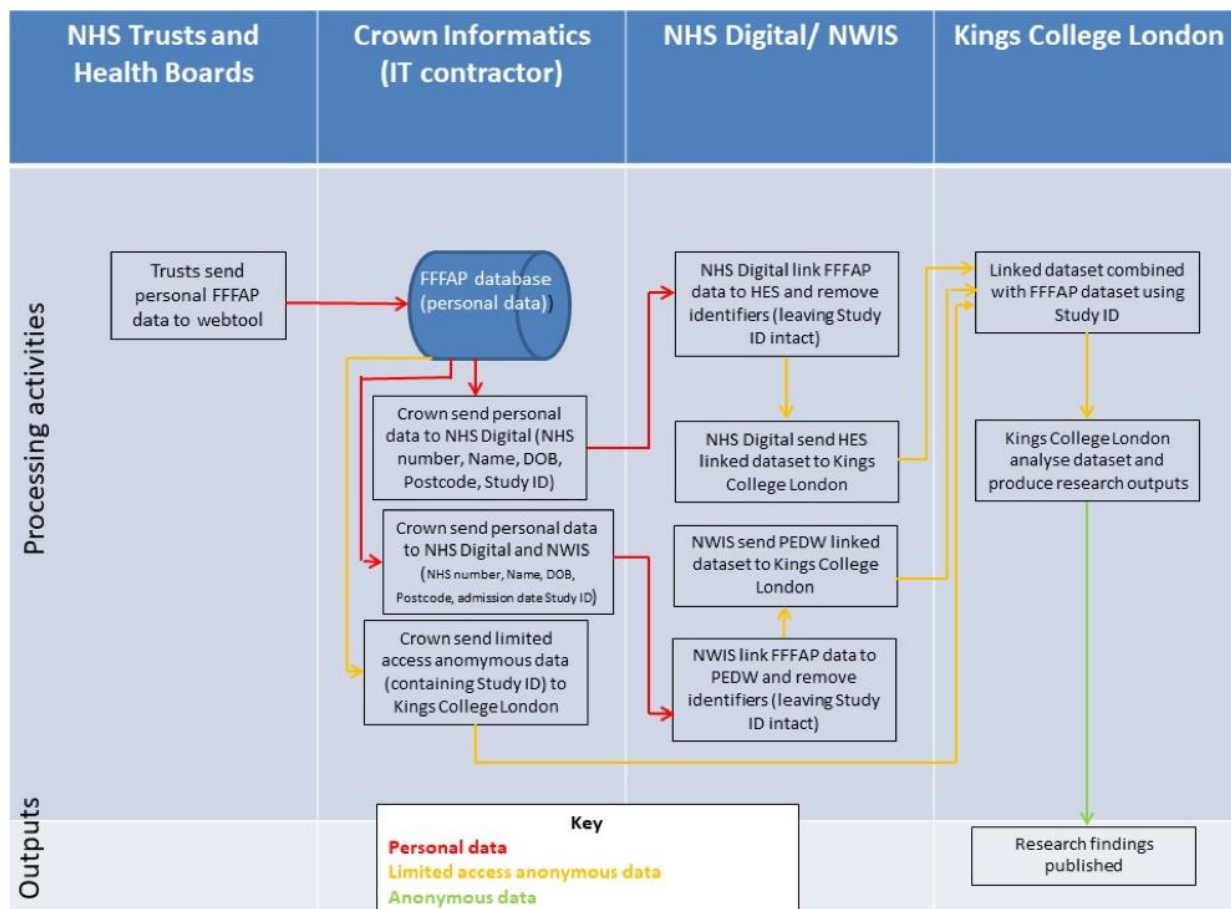

## 1.2 Data summary

A Study ID reflects a hip fracture care spell. In total, we received 6,428 unique Study ID's from PHFSA. For NHFD, we received 10,296 unique Study ID's. For NWIS, we received 554 unique Study ID's. For NHSD we received 9,553 unique Study ID's (Table 1).

Table 1: Summary of data from NHFD, PHFSA, NHSD, NWIS, and AcuteFA

|                                         | DATASET |       |         |      |         |
|-----------------------------------------|---------|-------|---------|------|---------|
|                                         | NHFD    | PHFSA | NHSD    | NWIS | AcuteFA |
| Number of rows                          | 10,440  | 6,584 | 125,642 | 676  | 73      |
| Number of rows with non-unique Study ID | 72      | 54    | 62,814  | 0    | NA      |
| Number of columns                       | 28      | 144   | 31      | 81   | 20      |
| Unique Number of Study ID's*            | 10,296  | 6,428 | 9,553   | 554  | NA      |

\*Following removal of rows with non-unique Study ID

## 1.3 Data structure

### 1.3.1 Physiotherapy Hip Fracture Sprint Audit (PHFSA)

We requested Study ID, Hospital, Trust, and for each of the first seven days physiotherapy postoperatively: Intensity and quality of therapy: what therapy? Intensity and quality of therapy: by whom? Intensity and quality of therapy: for how long? Intensity and quality of therapy: if not, why not? How do you get around?

We received 6,584 care spells (54 duplicates) for 6,428 unique Study ID's.

### 1.3.2 Acute 'Facilities Audit' (AcuteFA)

We requested Study ID, what are your services normal working hours on week days? Who typically provides physiotherapist-led rehabilitation on weekdays in the first week post-op? Who typically provides physiotherapist-led rehabilitation at weekends in the first week post op.? On which days of the week could your service provide physiotherapy led mobilisation to hip fracture patients on the day after their operation? Are you able to continue physiotherapist-led rehabilitation for all hip fracture patients every day until they have achieved their rehabilitation goals? Do physiotherapists involved attend a trauma and orthopaedic clinical governance meeting? What do you feel limits your ability to provide physiotherapist-led rehabilitation (select up to 2)? Do you have adequate space for rehabilitation? What functional outcome measure do you routinely use? What quality of life outcome measure do you routinely use?

We received 73 hospital audits for 66 Trust.

### 1.3.3 National Hip Fracture Database (NHFD)

We requested Study ID, Days from A&E admission to orthopaedic/orthogeriatric ward admission, Weekend A&E admission, Weekend orthopaedic/orthogeriatric ward admission, After hours A&E admission, After hours orthopaedic/orthogeriatric ward admission, Days from orthopaedic/orthogeriatric ward admission to surgery, Weekend surgery, After hours surgery, Age at admission, Sex, Admitted from, Pre-fracture mobility, AMTS preop, AMTS postop, Type of fracture, Pathological, Days from surgery to discharge from acute orthopaedic ward, ASA grade, Type of anaesthesia, Reason if delayed >36 hours, Operation performed, Mobilised on day of or day following surgery, Discharge destination from acute orthopaedic ward, Residential status: 30 days, and Mobility at 120 days.

We received 10,440 care spells of which 72 were records with a non-unique Study ID (Crown Informatics indicated: 20 Bilateral fractures, 42 hospital errors, 6 duplicate records and 4 Misidentified patients (a pair of records with the same NHS number but differing patient names/DoB). Care spells of the patients with these records were excluded leaving 10,296 unique Study ID's.

### **1.3.4 Hospital episode statistics (NHSD)**

We requested Study ID, ethnicity, IMD index of multiple deprivation, IMD health and disability domain, IMD overall rank, diagnosis codes (up to 20) and fact of death at 30-days for hip fracture care spells during the study period. We also requested diagnosis codes (up to 20 per care spell) for all care spells in the year prior to the hip fracture care spell (irrespective of admitting diagnosis) and any care spells that occurred in the 30-days post discharge from the hip fracture care spell.

We received 125,642 care spells from NHSD for 9,553 unique Study ID's. 62,814 care spells were kept, and the rests were duplicates. Readmission is identified by considering the repetition of the study id within 30-days from the discharge date, given that the admission date for the same study ID was in the period of [2017-05-01, 2017-06-30].

### **1.3.5 Patient episode database for Wales (NWIS)**

We requested Study ID, ethnicity, IMD index of multiple deprivation, IMD health and disability domain, IMD overall rank, diagnosis codes (up to 14) and fact of death at 30-days for hip fracture care spells during the study period. We also requested any care spells that occurred in the 30-days post discharge from the hip fracture care spell.

We received 676 care spells (0 duplicates) for 554 unique Study ID's.

## **2. PREPEARING DATA**

### **2.1 Data validation**

1. In the final dataset, we included data for Study ID's from PHFSA if the same Study ID's were present in NHFD. We identified 483 unique Study ID's (496 rows) in PHFSA that do not exist in NHFD. We removed these 483 unique Study ID's.
2. In the final dataset, we included one row per Study ID from PHFSA. We identified 85 unique Study ID's occurring on 2 rows and 2 unique Study ID's occurring on 3 rows. We retained the most complete Study ID only.
3. In the final dataset, we included data for Study IDs from either NWIS or NHSD. We identified 63 Study ID's (with 68 rows) common to NWIS and NHSD. We retained data from NHSD only.
4. In the final dataset, we included data for Study ID's from NHSD and NWIS if the same Study ID's were present in NHFD. We identified 73 unique Study ID's (516 rows) in NHSD and NWIS that do not exist in NHFD. We removed these 73 unique Study ID's.

### **2.2 Variables for the analytical dataset**

1. We retained variables from the original datasets (section 3.1) with the application of predefined rules for the following:
  - a. Blank fields in the variables for durations of physiotherapy in minutes received on each day (Day 0 to Day 6) during the first week postoperative were interpreted following four rules:
    - i. If physiotherapy was not received on day X for a recorded reason and the type of physiotherapy is missing then blank cell for duration was imputed to 0 minutes.
    - ii. If physiotherapy was not received on day X for a recorded reason and the type of physiotherapy is recorded then blank cell for duration was considered missing.

- iii. If no reason is given for physiotherapy not been received on day X and the type of physiotherapy is missing then blank cell for duration was imputed to 0.
  - iv. If no reason is given for physiotherapy not been received on day X and the type of physiotherapy is recorded then blank cell for duration was considered missing.
2. We created new variables for the analytical dataset (section 3.2). In particular,
- a. Hospital frailty risk score (HFS) and Charlson Comorbidity Index scores (CCI) was were calculated using all available diagnostic codes that were documented in the year prior to hip fracture surgery for each patient from the NHSD and NWIS following published guidance from:
    - Gilbert T, Neuburger J, Kraindler J, Keeble E, Smith P, Ariti C, Arora S, Street A, Parker S, Roberts HC, Bardsley M. Development and validation of a Hospital Frailty Risk Score focusing on older people in acute care settings using electronic hospital records: an observational study. *The Lancet*. 2018 May 5;391(10132):1775-82.
    - Deyo RA, Cherkin DC, Ciol MA. Adapting a clinical comorbidity index for use with ICD-9-CM administrative databases. *J Clin Epidemiol*. 1992; 45: 613-9
  - b. Defined readmission as the repetition of the study id within 30-days from the discharge date:
    - i. If an admission date is in the study time period [2017-05-01, 2017-06-30] and another admission date is found within 30-days post discharge then readmission was imputed to 1.
    - ii. If an admission date is in the study time period [2017-05-01, 2017-06-30] but no other admission is found in that time period, readmission was imputed to 0.
    - iii. If no admission date is recorded in the time period of [2017-05-01, 2017-07-31], readmission was imputed to 0.

### 2.3 Linking data

We created three mutually exclusive datasets, all subsets of NHFD, using Study ID as the common data element (Figure 2, Table 2):

- NHFD set (excluding study IDs not existing in NHSD or NWIS),
- NHSD set (including the common study IDs with NWIS)
- and NWIS set (excluding study IDs common with NHSD).

These three datasets were reunited in one final dataset that we linked to PHFSA using Study ID. The final dataset was linked to AcuteFA using Hospital as the common data element between AcuteFA and NHFD.

Table 2: datasets after cleaning

|                         | DATASET |       |        |      |         |
|-------------------------|---------|-------|--------|------|---------|
|                         | NHFD    | PHFSA | NHSD   | NWIS | AcuteFA |
| Number of columns       | 28      | 144   | 31     | 81   | 20      |
| No of rows              | 10,296  | 5,858 | 62,300 | 598  | 73      |
| No. of unique Study IDs | 10,296  | 5,858 | 9,483  | 488  | NA      |

Figure 2: The intersections among datasets per study IDs

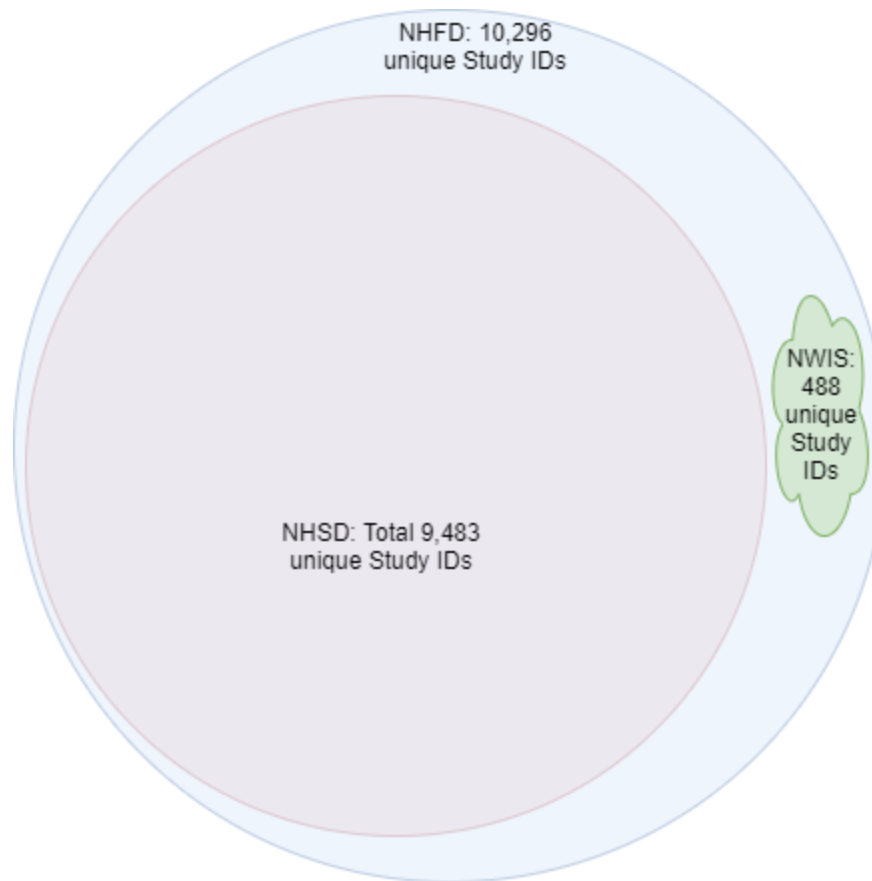

### 3. VARIABLES IN THE ANALYTICAL DATASET

#### 3.1 Original variables

We retained Study ID (patients' identifiers), age, sex, hospital at surgery, accident and emergency length of stay, preoperative length of stay, and postoperative length of stay in the analytical dataset (Table 3).

Table 3 Original variables retained in the analytical dataset

| Variable | Description                                   | Data field / Database | Code or values                        |
|----------|-----------------------------------------------|-----------------------|---------------------------------------|
| STUDY_ID | Unique ID to identify individual care spells. | 1 - NHFD              | Nominal                               |
| AGE      | Age at admission.                             | 13 - NHFD             | positive integer<br>NA - missing      |
| SEX      | Sex.                                          | 14 - NHFD             | 0 - Female<br>1 - Male<br>NA- missing |
| HOSPITAL | Hospital at surgery.                          | 3 - NHFD              | Nominal                               |

|            |                                                                       |           |                                  |
|------------|-----------------------------------------------------------------------|-----------|----------------------------------|
| AE_LOS     | Days from AE admission to orthopaedic/ orthogeriatric ward admission. | 4 - NHFD  | positive integer<br>NA- missing  |
| PREOP_LOS  | Days from orthopaedic orthogeriatric ward admission to surgery.       | 10 - NHFD | positive integer<br>NA – missing |
| POSTOP_LOS | Days from surgery to discharge from acute orthopaedic ward.           | 26 - NHFD | positive integer<br>NA – missing |



### 3.2 New variables

Other variables calculated for the analytical dataset include patient and system factors, which may affect rehabilitation and outcomes after hip fracture surgery, as well as study outcome variables (Table 4).

Table 4: New variables included in the analytical dataset

| Variable | Description                                                                                      | Data field / Database                                        | Code or values                                                                 |
|----------|--------------------------------------------------------------------------------------------------|--------------------------------------------------------------|--------------------------------------------------------------------------------|
| DATASET  | Name of mutually exclusively dataset- NHFD, NHSD, NWIS                                           | Calculated based on StudyID from NHFD, NWIS and NHSD         | Character<br>NHFDOnly- NHFD only<br>NHSDOnly- NHSD only<br>NWISOnly- NWIS only |
| PATHHF   | Pathological fracture at index admission.                                                        | Calculated from diagnosis codes [NWIS/NHSD databases] [NHFD] | 0 – No<br>1 – Yes (C34, C50, C61, C64, C65, C78,C79, C80, C90)<br>NA– Missing  |
| PAGET    | Presentation of Paget’s disease of the bone in year prior to, and including admission            | Calculated from diagnosis codes [NWIS/NHSD databases]        | 0 -No<br>1 – Yes (M88)<br>NA– Missing                                          |
| HRTFAIL  | Presentation of heart failure or pulmonary edema in year prior to, and including admission       | Calculated from diagnosis codes [NWIS/NHSD databases]        | 0 – No<br>1 – Yes (ICD-10 I50, J81)<br>NA– Missing                             |
| COPD     | Presentation of chronic obstructive pulmonary diseases in year prior to, and including admission | Calculated from diagnosis codes [NWIS/NHSD databases]        | 0 – No<br>1 – Yes (ICD-10 J41, J42, J43, J44, J47)<br>NA– Missing              |

|          |                                                                                            |                                                       |                                                                                      |
|----------|--------------------------------------------------------------------------------------------|-------------------------------------------------------|--------------------------------------------------------------------------------------|
| IHDA     | Presentation of ischemic heart disease (acute) in year prior to, and including admission   | Calculated from diagnosis codes [NWIS/NHSD databases] | 0 – No<br>1 – Yes (ICD-10 I20, I21, I22, I24)<br>NA– Missing                         |
| CDYS     | Presentation of cardiac dysrhythmias in year prior to, and including admission             | Calculated from diagnosis codes [NWIS/NHSD databases] | 0 – No<br>1 – Yes (ICD-10 I47, I48, I49)<br>NA– Missing                              |
| IHDC     | Presentation of ischemic heart disease (chronic) in year prior to, and including admission | Calculated from diagnosis codes [NWIS/NHSD databases] | 0 – No<br>1 – Yes (ICD-10 I25)<br>NA– Missing                                        |
| HYP      | Presentation of hypertension in year prior to, and including admission                     | Calculated from diagnosis codes [NWIS/NHSD databases] | 0 – No<br>1 – Yes (ICD-10 I10, I11)<br>NA– Missing                                   |
| HYPO     | Presentation of hypotension in year prior to, and including admission                      | Calculated from diagnosis codes [NWIS/NHSD databases] | 0 – No<br>1 – Yes (ICD-10 I95)<br>NA– Missing                                        |
| DIA      | Presentation of diabetes with complication in year prior to, and including admission       | Calculated from diagnosis codes [NWIS/NHSD databases] | 0 – No<br>1 – Yes (ICD-10 E100-E108, E110-E118, E130-E138, E140-E148)<br>NA– Missing |
| DEMENTIA | Presentation of Alzheimer's or dementia in year prior to, and including admission          | Calculated from diagnosis codes [NWIS/NHSD databases] | 0 -No<br>1 – Yes (ICD-10 F00, F01, F02, F03, G30)<br>NA– Missing                     |
| DEPR     | Presentation of depression in year prior to, and including admission                       | Calculated from diagnosis codes [NWIS/NHSD databases] | 0 -No<br>1 – Yes (ICD-10 F204, F32, F33, F34, F43)<br>NA– Missing                    |

|                 |                                                                    |                                                       |                                                                                                                                        |
|-----------------|--------------------------------------------------------------------|-------------------------------------------------------|----------------------------------------------------------------------------------------------------------------------------------------|
| DELIRIUM        | Presentation of delirium in year prior to, and including admission | Calculated from diagnosis codes [NWIS/NHSD databases] | 0 -No<br>1 – Yes (ICD-10 F05)<br>NA– Missing                                                                                           |
| HFR_score       | Hospital frailty risk score                                        | Calculated from diagnosis codes [NWIS/NHSD databases] | Integer<br>NA-missing                                                                                                                  |
| HFR             | Hospital frailty risk group                                        | Calculated from HFR_score [Analytical dataset]        | <ul style="list-style-type: none"> <li>• Lowe risk</li> <li>• Intermeridate risk</li> <li>• Higher Risk</li> <li>NA-missing</li> </ul> |
| CCI_score       | Charlson Comorbidity index Score                                   | Calculated from diagnosis codes [NWIS/NHSD databases] | Integer ranged 0-9<br>NA-missing                                                                                                       |
| CCI             | Charlson Comorbidity index group                                   | Calculated from CCI_score [Analytical dataset]        | <ul style="list-style-type: none"> <li>0- CCI=0</li> <li>1- CCI=1 or 2</li> <li>2- CCI=3 or 4</li> <li>3- CCI &gt;=5</li> </ul>        |
| CCI_wscore      | Charlson Comorbidity index Score                                   | Calculated from diagnosis codes [NWIS/NHSD databases] | Integer ranged 0-14<br>NA-missing                                                                                                      |
| CCI_w           | Charlson Comorbidity Score group                                   | Calculated from CCI_wscore [Analytical dataset]       | <ul style="list-style-type: none"> <li>0- CCI=0</li> <li>1- CCI=1 or 2</li> <li>2- CCI=3 or 4</li> <li>3- CCI &gt;=5</li> </ul>        |
| PREOP_DEL_AMTS  | Presentation of delirium during admission before surgery           | Calculated from AMTS preop score [NHFD]               | 0 -No<br>1- Yes (AMTS score of 6 or less)<br>NA- missing                                                                               |
| POSTOP_DEL_AMTS | Presentation of delirium during admission after surgery            | Calculated from AMTS postop score [NHFD]              | 0 -No<br>1- Yes (AMTS score of 6 or less)<br>NA- missing                                                                               |
| DEL_AMTS        | Presentation of delirium during admission                          | Calculated from AMTS preop and postop score [NHFD]    | 0 -No<br>1- Yes (AMTS score of 6 or less in either or both preop and postop AMTS)<br>NA - missing                                      |

|               |                                        |                                                                                                                                             |                                                                                                                                                                                                                                                 |
|---------------|----------------------------------------|---------------------------------------------------------------------------------------------------------------------------------------------|-------------------------------------------------------------------------------------------------------------------------------------------------------------------------------------------------------------------------------------------------|
| COMORBIDCOUNT | Count of comorbid diagnoses            | Calculated from count of diagnosis codes for HRTFAIL, COPD, IHDA, CDYS, IHDC, HYP, HYPO, DIA, DEMENTIA, DEPR, DELIRIUM [analytical dataset] | positive integer                                                                                                                                                                                                                                |
| ETHNICITY     |                                        | [NHSD]                                                                                                                                      | 0 - White<br>1- White and Black Caribbean (Mixed)<br>2- White and Black African (Mixed)<br>3 - White and Asian (Mixed)<br>4 - Any other Mixed background<br>5 - Asian/Asian British<br>6 – Black or Black British<br>7 - Chinese<br>NA- missing |
| DEPRIVATION1  | IMD Index of multiple deprivation      | IMD04 [NHSD]                                                                                                                                | positive integer<br>NA - missing                                                                                                                                                                                                                |
| DEPRIVATION2  | IMD Health and disability domain value | IMD04HD [NHSD]                                                                                                                              | positive integer<br>NA- missing                                                                                                                                                                                                                 |
| DEPRIVATION3  | IMD Overall rank                       | IMD04RK [NHSD]                                                                                                                              | positive integer<br>NA- missing                                                                                                                                                                                                                 |

|              |                                                             |                                                                                                             |                                                                                                                                                                                                                                                                                           |
|--------------|-------------------------------------------------------------|-------------------------------------------------------------------------------------------------------------|-------------------------------------------------------------------------------------------------------------------------------------------------------------------------------------------------------------------------------------------------------------------------------------------|
| DEPRIVATION4 | IMD Decile Group                                            | Calculated from IMD04RK [NHSD and NWIS]                                                                     | 0 - least deprived 10%<br>1 -less deprived 10-20%<br>2 - less deprived 20-30%<br>3 - less deprived 30-40%<br>4- less deprived 40-50%<br>5- more deprived 40-50%<br>6 - more deprived 30-40%<br>7- more deprived 20-30%<br>8- more deprived 10-20%<br>9- most deprived 10%<br>NA - missing |
| DAYADM       | Indicator of admission on weekend or weekday.               | Calculated from: weekend a&e admission and weekend orthopaedic/orthogeriatric ward admission [NHFD]         | 0 - weekday (Monday-Friday)<br>1 - weekend (Saturday-Sunday)<br>NA- missing                                                                                                                                                                                                               |
| TIMEADM      | Indicator of admission after hours or during working hours. | Calculated from: after hours a&e admission and after hours orthopaedic/orthogeriatric ward admission [NHFD] | 0 – working hours<br>1- after hours (19:00 – 06:59)<br>NA - missing                                                                                                                                                                                                                       |
| RESIDENCE    | Prefracture residence                                       | Calculated from Admitted from [NHFD]                                                                        | 0 – Own home/sheltered housing<br>1- nursing care/residential care<br>NA- missing                                                                                                                                                                                                         |
| FR_TYPE      | Subtype of hip fracture at admission                        | Calculated from: Fracture type [NHFD]                                                                       | 0 – Intracapsular<br>1 – Intertrochanteric<br>2 – Subtrochanteric<br>NA- missing                                                                                                                                                                                                          |
| SXFLAG       | Flag for any record of hip fracture surgery                 | Calculated from Operation type [NHFD]                                                                       | 0 - No<br>1 – Yes<br>NA - missing                                                                                                                                                                                                                                                         |
| Sx_TIMING    | Indicator of surgery within target time of 36 hours.        | Calculated from reason if delayed >36 hours [NHFD]                                                          | 0 - yes<br>1- no<br>NA - missing                                                                                                                                                                                                                                                          |

|               |                                                                                 |                                                                                                                                                                                                                                                                    |                                                                                           |
|---------------|---------------------------------------------------------------------------------|--------------------------------------------------------------------------------------------------------------------------------------------------------------------------------------------------------------------------------------------------------------------|-------------------------------------------------------------------------------------------|
| AdmSxDelay    | Indicator of administrative surgical delay                                      | Calculated from reason if delayed >36 hours [NHFD]                                                                                                                                                                                                                 | 0 - no (/not delayed)<br>1- yes<br>NA– missing/medical reason for delay                   |
| MedSxDelay    | Indicator of medical surgical delay                                             | Calculated from reason if delayed >36 hours [NHFD]                                                                                                                                                                                                                 | 0 - no (/not delayed)<br>1- yes<br>NA – missing/administrative reason for delay           |
| ANAESTH       | Type of anaesthesia                                                             | Calculated from X4.03v10.Anaesthesia [NHFD]                                                                                                                                                                                                                        | 0 - General (GA)<br>1 - Spinal (SA)<br>NA - missing                                       |
| PROCTYPE      | Procedure type                                                                  | Calculated from: Operation type [NHFD]                                                                                                                                                                                                                             | 0 – no operation performed<br>1 - Internal fixation<br>2 - Hemi<br>3 - THR<br>NA- missing |
| MOB_TIMING    | Indicator of mobilisation after surgery within target time of day of/day after. | Calculated from: mobilisation on day of surgery [NHFD]                                                                                                                                                                                                             | 0 - Within target time<br>1 - After target time<br>NA - missing                           |
| TOTAL_LOS     | Total length of stay                                                            | Sum of<br>"Days.from.A.E.admission.to.orthopaedic.orthogeriatric.ward.admission...Integer.",<br>"Days.from.orthopaedic.orthogeriatric.ward.admission.to.surgery...Integer.",<br>"Days.from.surgery.to.discharge.from.acute.orthopaedic.ward....Integer."<br>[NHFD] | Positive integer<br>NA- missing                                                           |
| HOSPITALDEATH | Indicator of inhospital death                                                   | Calculated from: discharge destination from acute orthopaedic ward [NHFD]                                                                                                                                                                                          | 0 – no<br>1 – yes<br>NA - missing                                                         |

|                     |                                                                                               |                                                                                                                                                                                                                       |                                                                                                                                                                                                                                             |
|---------------------|-----------------------------------------------------------------------------------------------|-----------------------------------------------------------------------------------------------------------------------------------------------------------------------------------------------------------------------|---------------------------------------------------------------------------------------------------------------------------------------------------------------------------------------------------------------------------------------------|
| DISCHARGEDEST       | Discharge destination                                                                         | Calculated from:<br>X6.02v9.Ward.discharge.<br>destination [NHFD]                                                                                                                                                     | 0 – Own home/sheltered<br>housing<br>1- nursing care/residential<br>care<br>2 – rehabilitation unit<br>3 – acute hospital/unit<br>4 - dead<br>NA– missing/Other                                                                             |
| READMIT30           | Indicator of<br>readmission within<br>30-days of discharge<br>from hip fracture care<br>spell | Calculated from:<br>discharge date [NHSD]<br><br>Check first admission to<br>be in the study period<br><br>Then check discharge<br>date.<br><br>New admission should be<br>with 30 days of the last<br>discharge date | 0 – no<br>1 – yes<br>NA – missing                                                                                                                                                                                                           |
| DEATH30             | Indicator of death at<br>30 days                                                              | Calculated from: fact of<br>death at 30 days post<br>admission [NHSD ,<br>NWIS]                                                                                                                                       | 0 – no<br>1 – yes<br>NA - missing                                                                                                                                                                                                           |
| PREFRACTURE_MO<br>B | Level of mobility<br>prior to hip fracture.                                                   | Calculated from:<br>Pre.fracture.mobility<br>[NHFD]                                                                                                                                                                   | 0- Freely mobile without<br>aids<br>1 - Mobile outdoors with<br>one aid<br>2 - Mobile outdoors with<br>two aids or frame<br>3 – Some indoor mobility<br>but never goes outside<br>without help<br>4 - No functional mobility<br>NA- missing |

|              |                                                                                                                                                                                                                                       |                                                                                                                                                                                                                                                                                                                                                                       |                                                                                                                                                                                                                                                                                                                                                                        |
|--------------|---------------------------------------------------------------------------------------------------------------------------------------------------------------------------------------------------------------------------------------|-----------------------------------------------------------------------------------------------------------------------------------------------------------------------------------------------------------------------------------------------------------------------------------------------------------------------------------------------------------------------|------------------------------------------------------------------------------------------------------------------------------------------------------------------------------------------------------------------------------------------------------------------------------------------------------------------------------------------------------------------------|
| ASA          | The American Society of Anesthesiologists (ASA) physical status classification system was developed to offer clinicians a simple categorization of a patient's physiological status that can be helpful in predicting operative risk. | Calculated from: X4.02v10.ASA.Grade [NHFD]                                                                                                                                                                                                                                                                                                                            | <p>0 - Normal healthy individual</p> <p>1 - Mild systemic disease that does not limit activity</p> <p>2 - Severe systemic disease that limits activity but is not incapacitating</p> <p>3 - Incapacitating systemic disease which is constantly life-threatening</p> <p>4 - Moribund - not expected to survive 24 hours with or without surgery</p> <p>NA- missing</p> |
| RESIDENCE120 | Residence at 120 days post fracture                                                                                                                                                                                                   | Calculated from X8.01v9.Residential.120.days [NHFD]                                                                                                                                                                                                                                                                                                                   | <p>0 – Own home/sheltered housing</p> <p>1- nursing care/residential care</p> <p>2 – rehabilitation unit</p> <p>3 – acute hospital</p> <p>4 - dead</p> <p>NA – missing/NA/Other/Unknown</p>                                                                                                                                                                            |
| RECOVERY120  | Indicator of mobility recovery at 120 days                                                                                                                                                                                            | Calculated as no change (or an improvement) in the measure of function (X8.02v8.Mobility.at.120.days) from prefracture to 120-days post-fracture. The NHFD defines function as mobile without aids, mobile outdoors with one aid, mobile outdoors with two aids or frame, some indoor mobility but never goes outside without help, or no functional mobility. [NHFD] | <p>0 – no</p> <p>1 – yes</p> <p>NA - missing</p>                                                                                                                                                                                                                                                                                                                       |



|               |                                                        |                                                                              |                                                                                                                                                                                                                          |
|---------------|--------------------------------------------------------|------------------------------------------------------------------------------|--------------------------------------------------------------------------------------------------------------------------------------------------------------------------------------------------------------------------|
| EXT_HR        | Indicator of extended hours in physiotherapy service   | Calculated from 3b. services working hours [Acute Facilities Audit]          | 0 – No (Monday to Friday (0800-1600/1700))<br>1 – Yes (Monday to Friday (extended hours))<br>NA-Missing                                                                                                                  |
| Staff_WEEKD   | Indicator of rehabilitation staff case mix on weekdays | Calculated from 2a. physio rehab Weekdays [Acute Facilities Audit]           | 0 –Physiotherapists/ physiotherapy assistants/ nurses/OT/OT assistants<br>1 – Physiotherapists/ physiotherapy assistants<br>2– Physiotherapists                                                                          |
| Staff_WEEKE   | Indicator of rehabilitation staff case mix on weekend  | Calculated from 2b. physio rehab Weekends [Acute Facilities Audit]           | 0 –Physiotherapists/ physiotherapy assistants/ nurses/OT/OT assistants<br>1 – Physiotherapists/ physiotherapy assistants<br>2– Physiotherapists<br>NA-Missing                                                            |
| PT_Staff_Week | Indicator of physiotherapy staff during week           | Calculated from 3a. physio available to mobilise [Acute Facilities Audit]    | 0– Monday to Friday<br>1– Monday to Saturday<br>2– Monday to Sunday (Saturday and Sunday half day)<br>3– Monday to Sunday (Saturday full day and Sunday half day)<br>4– Monday to Sunday (Saturday and Sunday full days) |
| REHAB_GOALS   | Indicator of whether rehabilitation is goal orientated | Calculated from 3c. Continue rehab to achieve goals [Acute Facilities Audit] | 0 – No<br>1 – Monday to Friday<br>2 – Monday to Sunday                                                                                                                                                                   |

|             |                                                                                   |                                                                                                |                                                                                |
|-------------|-----------------------------------------------------------------------------------|------------------------------------------------------------------------------------------------|--------------------------------------------------------------------------------|
| GOVERNANCE  | Indicator of whether physiotherapists attend governance meetings                  | Calculated from 5. physio attend gov meetings [Acute Facilities Audit]                         | 0 – No<br>1 – Yes<br>2 – no meetings occur<br>NA: Missing                      |
| REHAB_SPACE | Indicator of adequate space for rehabilitation                                    | Calculated from 12. adequate space for rehab [Acute Facilities Audit]                          | 0 -No<br>1 – Yes in hospital<br>2 – Yes on ward &within the word<br>NA-Missing |
| Fx_Mx       | Functional outcome measures used by physiotherapy team                            | Calculated from 9. functional outcome measure [Acute Facilities Audit]                         | 0 – No<br>1 – Yes<br>NA-Missing                                                |
| QOL_Mx      | Quality of life outcome measures used by physiotherapy team                       | Calculated from 10. life outcome measures [Acute Facilities Audit]                             | 0 – No<br>1 – Yes<br>NA-Missing                                                |
| PT_FTE      | Indicator of perceived insufficient staffing to meet demand                       | Calculated from 4. Limit = lack of physiotherapy full time equivalent [Acute Facilities Audit] | 0 – No<br>1 – Yes<br>NA-Missing                                                |
| PT_FTE2     | Indicator of perceived insufficient staffing due to sick/maternity to meet demand | Calculated from 4. Limit = absence (sick/maternity) [Acute Facilities Audit]                   | 0 – No<br>1 – Yes<br>NA-Missing                                                |
| PT_WE       | Indicator of perceived insufficient weekend staffing to meet demand               | Calculated from 4. Limit = no weekend staff cover [Acute Facilities Audit]                     | 0 – No<br>1 – Yes<br>NA-Missing                                                |
| PT_EQ       | Indicator of perceived insufficient equipment to support goal attainment          | Calculated from 4. Limit = lack of equipment [Acute Facilities Audit]                          | 0 – No<br>1 – Yes<br>NA-Missing                                                |
| PT_BEDS     | Indicator of perceived insufficient bed capacity to support goal attainment       | Calculated from 4. Limit = hospital capacity (beds) [Acute Facilities Audit]                   | 0 – No<br>1 – Yes<br>NA-Missing                                                |

|         |                                      |                                                                                                                              |                                   |
|---------|--------------------------------------|------------------------------------------------------------------------------------------------------------------------------|-----------------------------------|
| ISPHFSA | Indicator of being included in PHFSA | Calculated in [PHFSA]                                                                                                        | 0 – No<br>1 – Yes                 |
| PTDAY0  | Indicator of physiotherapy day 0     | Calculated from ‘Day0Moblised’ ‘Day0GAIT’ ‘Day0ROM Exercise’ ‘Day0 Strength’ ‘Day0 Balance’ ‘Day0 Transfer Practice’ [PHFSA] | 0 – No<br>1 – Yes<br>NA -Missing  |
| PTDAY1  | Indicator of physiotherapy day 1     | Calculated from ‘Day1Moblised’ ‘Day1GAIT’ ‘Day1ROM Exercise’ ‘Day1Strength’ ‘Day1Balance’ ‘Day1 Transfer Practice’ [PHFSA]   | 0 – No<br>1 – Yes<br>NA – Missing |
| PTDAY2  | Indicator of physiotherapy day 2     | Calculated from ‘Day2Moblised’ ‘Day2GAIT’ ‘Day2ROM Exercise’ ‘Day2Strength’ ‘Day2Balance’ ‘Day2 Transfer Practice’ [PHFSA]   | 0 – No<br>1 – Yes<br>NA – Missing |
| PTDAY3  | Indicator of physiotherapy day 3     | Calculated from ‘Day3Moblised’ ‘Day3GAIT’ ‘Day3ROM Exercise’ ‘Day3Strength’ ‘Day3Balance’ ‘Day3 Transfer Practice’ [PHFSA]   | 0 – No<br>1 – Yes<br>NA – Missing |
| PTDAY4  | Indicator of physiotherapy day 4     | Calculated from ‘Day4Moblised’ ‘Day4GAIT’ ‘Day4ROM Exercise’ ‘Day4Strength’ ‘Day4Balance’ ‘Day4 Transfer Practice’ [PHFSA]   | 0 – No<br>1 – Yes<br>NA – Missing |
| PTDAY5  | Indicator of physiotherapy day 5     | Calculated from ‘Day5Moblised’ ‘Day5GAIT’ ‘Day5ROM Exercise’ ‘Day5Strength’ ‘Day5Balance’ ‘Day5 Transfer Practice’ [PHFSA]   | 0 – No<br>1 – Yes<br>NA – Missing |

|               |                                                                                 |                                                                                                                            |                                              |
|---------------|---------------------------------------------------------------------------------|----------------------------------------------------------------------------------------------------------------------------|----------------------------------------------|
| PTDAY6        | Indicator of physiotherapy day 6                                                | Calculated from 'Day6Mobilised' 'Day6GAIT' 'Day6ROM Exercise' 'Day6Strength' 'Day6Balance' Day6 Transfer Practice' [PHFSA] | 0 – No<br>1 – Yes<br>NA– Missing             |
| FREQUENCY     | Days of physiotherapy received in the first postoperative week                  | Calculated from PTDAY0 – PTDAY6 [Analytical dataset]                                                                       | positive integer<br>NA – Missing             |
| FREQUENCY_IND | Indicator of 0-5 vs. 6-7 days physiotherapy                                     | Calculated from FREQUENCY [Analytical dataset]                                                                             | 0 – 0-5 days<br>1 – 6-7 days<br>NA – Missing |
| DURATION_0    | Duration of physiotherapy (in minutes) received on the first postoperative day  | Calculated from 'Day0.Physio.time', 'Rehab.Day.0' and 'No.Rehab.Day.0' [PHFSA]                                             | Positive integer<br>NA-Missing               |
| DURATION_1    | Duration of physiotherapy (in minutes) received on the second postoperative day | Calculated from 'Day1.Physio.time' [PHFSA]                                                                                 | Positive integer<br>NA-Missing               |
| DURATION_2    | Duration of physiotherapy (in minutes) received on the third postoperative day  | Calculated from 'Day2.Physio.time' [PHFSA]                                                                                 | Positive integer<br>NA-Missing               |
| DURATION_3    | Duration of physiotherapy (in minutes) received on the fourth postoperative day | Calculated from 'Day3.Physio.time' [PHFSA]                                                                                 | Positive integer<br>NA-Missing               |
| DURATION_4    | Duration of physiotherapy (in minutes) received on the fifth postoperative day  | Calculated from 'Day4.Physio.time' [PHFSA]                                                                                 | Positive integer<br>NA-Missing               |

|                |                                                                                     |                                                                                                                                                                                                   |                                                                                                                          |
|----------------|-------------------------------------------------------------------------------------|---------------------------------------------------------------------------------------------------------------------------------------------------------------------------------------------------|--------------------------------------------------------------------------------------------------------------------------|
| DURATION_5     | Duration of physiotherapy (in minutes) received on the sixth postoperative day      | Calculated from<br>'Day5.Physio.time'<br>' [PHFSA]                                                                                                                                                | Positive integer<br>NA-Missing                                                                                           |
| DURATION_6     | Duration of physiotherapy (in minutes) received on the seventh postoperative day    | Calculated from<br>'Day6.Physio.time'<br>' [PHFSA]                                                                                                                                                | Positive integer<br>NA-Missing                                                                                           |
| DURATION_TOTAL | Total minutes of physiotherapy in the first postoperative week                      | Calculated from<br>DURATION_0<br>DURATION_1<br>DURATION_2<br>DURATION_3<br>DURATION_4<br>DURATION_5<br>DURATION_6<br>[Analytical dataset]                                                         | positive integer<br>NA- missing                                                                                          |
| DURATION_AVG   | Total minutes of physiotherapy in the first postoperative week                      | Calculated from<br>DURATION_0<br>DURATION_1<br>DURATION_2<br>DURATION_3<br>DURATION_4<br>DURATION_5<br>DURATION_6<br>[Analytical dataset]                                                         | positive integer<br>NA- missing                                                                                          |
| DURATION_2HR   | Indicator of rehabilitation duration of $\geq 2$ hours in the first week            | Calculated from<br>DURATION_TOTAL<br>[Analytical dataset]                                                                                                                                         | 0 – <120min<br>1 – $\geq 120$ min<br>NA – Missing                                                                        |
| PTTYPE0        | Indicator of physiotherapy type day 0 – mobilisation vs. mobilisation and exercises | Calculated from<br>Mobilised:<br>'Day0Moblised'<br>'Day0GAIT' Day0<br>Transfer<br>Practice'[PHFSA]<br><br>and<br><br>Exercise: 'Day0ROM<br>Exercise' 'Day0<br>Strength' 'Day0 Balance'<br>[PHFSA] | 0 – mobilised not exercise<br>1 - mobilised and exercise<br>2 – not mobilised not exercise<br>3 – not mobilised exercise |

|         |                                                                                     |                                                                                                                           |                                                                                                                          |
|---------|-------------------------------------------------------------------------------------|---------------------------------------------------------------------------------------------------------------------------|--------------------------------------------------------------------------------------------------------------------------|
| PTTYPE1 | Indicator of physiotherapy type day 1 – mobilisation vs. mobilisation and exercises | Calculated from ‘Day1Moblised’ ‘Day1GAIT’ ‘Day1ROM Exercise’ ‘Day1Strength’ ‘Day1Balance’ Day1 Transfer Practice’ [PHFSA] | 0 – mobilised not exercise<br>1 - mobilised and exercise<br>2 – not mobilised not exercise<br>3 – not mobilised exercise |
| PTTYPE2 | Indicator of physiotherapy type day 2 – mobilisation vs. mobilisation and exercises | Calculated from ‘Day2Moblised’ ‘Day2GAIT’ ‘Day2ROM Exercise’ ‘Day2Strength’ ‘Day2Balance’ Day2 Transfer Practice’ [PHFSA] | 0 – mobilised not exercise<br>1 - mobilised and exercise<br>2 – not mobilised not exercise<br>3 – not mobilised exercise |
| PTTYPE3 | Indicator of physiotherapy type day 3 – mobilisation vs. mobilisation and exercises | Calculated from ‘Day3Moblised’ ‘Day3GAIT’ ‘Day3ROM Exercise’ ‘Day3Strength’ ‘Day3Balance’ Day3 Transfer Practice’ [PHFSA] | 0 – mobilised not exercise<br>1 - mobilised and exercise<br>2 – not mobilised not exercise<br>3 – not mobilised exercise |
| PTTYPE4 | Indicator of physiotherapy type day 4 – mobilisation vs. mobilisation and exercises | Calculated from ‘Day4Moblised’ ‘Day4GAIT’ ‘Day4ROM Exercise’ ‘Day4Strength’ ‘Day4Balance’ Day4 Transfer Practice’ [PHFSA] | 0 – mobilised not exercise<br>1 - mobilised and exercise<br>2 – not mobilised not exercise<br>3 – not mobilised exercise |
| PTTYPE5 | Indicator of physiotherapy type day 5 – mobilisation vs. mobilisation and exercises | Calculated from ‘Day5Moblised’ ‘Day5GAIT’ ‘Day5ROM Exercise’ ‘Day5Strength’ ‘Day5Balance’ Day5 Transfer Practice’ [PHFSA] | 0 – mobilised not exercise<br>1 - mobilised and exercise<br>2 – not mobilised not exercise<br>3 – not mobilised exercise |
| PTTYPE6 | Indicator of physiotherapy type day 6 – mobilisation vs. mobilisation and exercises | Calculated from ‘Day6Moblised’ ‘Day6GAIT’ ‘Day6ROM Exercise’ ‘Day6Strength’ ‘Day6Balance’ Day6 Transfer Practice’ [PHFSA] | 0 – mobilised not exercise<br>1 - mobilised and exercise<br>2 – not mobilised not exercise<br>3 – not mobilised exercise |

|              |                                                                                                  |                                                        |                                                                                                                                                                                                                                                                                                                                                                                                                                                                                                                                                                                                                                                                                   |
|--------------|--------------------------------------------------------------------------------------------------|--------------------------------------------------------|-----------------------------------------------------------------------------------------------------------------------------------------------------------------------------------------------------------------------------------------------------------------------------------------------------------------------------------------------------------------------------------------------------------------------------------------------------------------------------------------------------------------------------------------------------------------------------------------------------------------------------------------------------------------------------------|
| PTTYPE_IND   | Indicator of physiotherapy type – mobilisation vs. mobilisation and exercises                    | Calculated from PTTYPE0 – PTTYPE6 [Analytical dataset] | <p>0 – mobilised only in the 7 days [PTTYPE0-PTTYPE6: 0 – mobilised not exercise only OR 0 – mobilised not exercise and 2 – not mobilised not exercise observed across the 7 days]</p> <p>1 – mobilisation and exercises across the 7 days</p> <p>[PTTYPE0-PTTYPE6: 1 - mobilised and exercise OR</p> <p>1 - mobilised and exercise AND 2 – not mobilised not exercise OR</p> <p>1 - mobilised and exercise AND 3 – not mobilised exercise OR</p> <p>0 – mobilised not exercise AND 1 - mobilised and exercise OR</p> <p>0 – mobilised not exercise AND 3 – not mobilised exercise OR</p> <p>2 – not mobilised not exercise AND 3 – not mobilised exercise across the 7 days]</p> |
| PTTYPE_COUNT | Count of days that physiotherapy type includes both mobilisation and exercises across the 7 days | Calculated from PTTYPE0 – PTTYPE6 [Analytical dataset] | positive integer                                                                                                                                                                                                                                                                                                                                                                                                                                                                                                                                                                                                                                                                  |
